# Supplementary material for: Electrochemical sensor based on a three dimensional nanostructured MoS2 nanosphere-PANI/reduced graphene oxide composite for simultaneous detection of ascorbic acid, dopamine, and uric acid
Source: Royal Society of Chemistry journal article supplement (doi:10.1039/c8ra09511f), 2019-01-01
Supplement: c8ra09511f1.pdf [file c8ra09511f1.pdf]

## *Supplementary Information for*

### **Electrochemical sensor base on three dimensional nanostructured MoS<sub>2</sub> nanospheres-PANI/reduced graphene oxide composite for simultaneous detection of ascorbic acid, dopamine, and uric acid**

Shuaihui Li<sup>a</sup>, Yashen Ma<sup>b</sup>, Yongkang Liu<sup>b</sup>, Gu Xin<sup>c\*</sup>, Minghua Wang<sup>b</sup>, Zhihong  
Zhang<sup>b\*</sup>, Zhongyi Liu<sup>a\*</sup>

<sup>a</sup>School of Chemical Engineering and Energy, Zhengzhou University, Zhengzhou  
450001, China.

<sup>b</sup>Henan Provincial Key Laboratory of Surface & Interface Science; Zhengzhou  
University of Light Industry, Zhengzhou 450002, China.

<sup>c</sup>College of Chemistry and Molecular Engineering, Zhengzhou University, Zhengzhou,  
450000, China.

\*Corresponding authors:

E-mail address: guxin@zzu.edu.cn; 2006025@zzuli.edu.cn; liuzhongyi@zzu.edu.cn

## **Contents**

**S1. Synthesis of GO, PANI and MoS<sub>2</sub> nanospheres**

**S2. Chemical structure and components of the samples**

**S3. SEM and TEM images of the samples**

**S4. Electrochemical active surface area of the as-synthesized  
nanomaterials**

**S5. Reproducibility of the developed biosensor**

**S6. Real sample analysis**

## **S1. Synthesis of GO, PANI and MoS<sub>2</sub> nanospheres**

Graphene oxide (GO) was prepared by acid oxidation of graphite powders according to the modified Hummers' method.<sup>1</sup> Crude GO was dispersed in 200 mL of ultrapure water and exfoliated with a Cell crusher (900-1000 W) for 2 h. After being dried using freeze drier, the GO product was obtained finally. GO (50 mg) was added to 40 mL of ultrapure water and sonicated thoroughly until a homogeneous suspension of GO (1.25 mg mL<sup>-1</sup>) was obtained. PANI was synthesized according to our previous literature.<sup>2</sup>

MoS<sub>2</sub> nanospheres were prepared by hydrothermal method. Briefly, 0.40 g Na<sub>2</sub>MoO<sub>4</sub>·2H<sub>2</sub>O, 0.66 g thiourea, and 0.25 g PVP were dissolved in 40 mL of deionized water to form a homogeneous solution. Then the solution was transferred to a 50 mL Teflon-lined stainless steel autoclave and heated in an electric oven at 180 °C for 24 h. After cooling to room temperature, the precipitate was isolated by centrifugation and washed thoroughly with deionized water and ethanol for several times, followed by drying in a vacuum oven at 60 °C for 12 h.

## S2. Chemical structure and components of the samples

The FT-IR spectra of GO, pristine PANI,  $\text{MoS}_2/\text{rGO}$ , and  $\text{MoS}_2\text{-PANI/rGO}$  nanocomposites are illustrated in **Fig. S1**. The characteristic absorption bands at  $\sim 3420$  and  $\sim 2920$   $\text{cm}^{-1}$  represented  $-\text{NH}_2/-\text{OH}$ , and  $-\text{CH}_2/-\text{CH}_3$  groups. The characteristic peaks ascribed to aromatic  $\text{C}=\text{C}$  ( $\sim 1627$   $\text{cm}^{-1}$ ) and  $\text{C}-\text{O}$  groups ( $\text{C}-\text{OH}$  at  $\sim 1403$   $\text{cm}^{-1}$  and  $\text{C}-\text{O}$  at  $\sim 1086$   $\text{cm}^{-1}$ ) are observed in the FTIR spectra of GO and  $\text{MoS}_2/\text{rGO}$ , and  $\text{MoS}_2\text{-PANI/rGO}$  samples. The intensity of absorption band at  $1730$   $\text{cm}^{-1}$  for carboxylate  $\text{C}=\text{O}$  stretching was weakened in  $\text{MoS}_2/\text{rGO}$ , whereas the peak disappeared in  $\text{MoS}_2\text{-PANI/rGO}$ , indicating the reduction of GO to rGO.<sup>3</sup> The bands at  $\sim 1580$   $\text{cm}^{-1}$  ( $\text{C}=\text{N}$  stretching),  $\sim 1495$   $\text{cm}^{-1}$  ( $\text{C}=\text{C}$  stretching),  $\sim 1289$   $\text{cm}^{-1}$  ( $\text{C}-\text{N}$  vibration),<sup>4</sup>  $\sim 1129$   $\text{cm}^{-1}$  (polaron formation of PANI ( $\text{Q} = \text{N}^+\text{H}-\text{B}$  or  $\text{B}-\text{N}^+\text{H}-\text{B}$ )),<sup>5</sup>  $\sim 799$   $\text{cm}^{-1}$  and (ring  $\text{C}-\text{C}$  bending vibration) prove the presence of PANI in  $\text{MoS}_2\text{-PANI/rGO}$  nanocomposite.

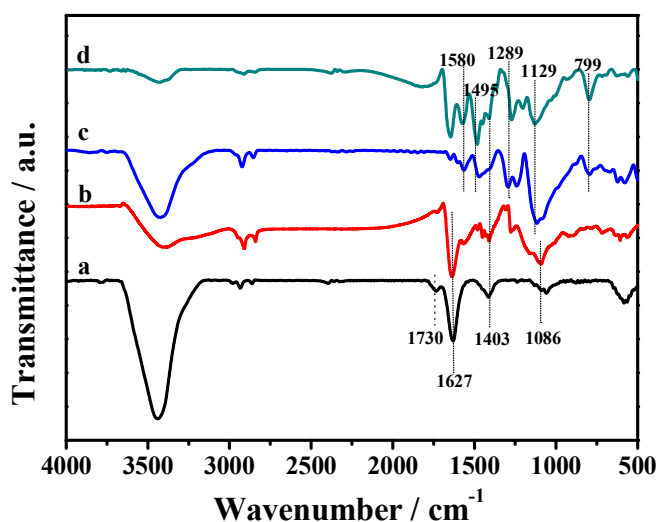

**Fig. S1** FT-IR spectra of (a) GO, (b)  $\text{MoS}_2/\text{rGO}$ , (c) PANI and (d)  $\text{MoS}_2\text{-PANI/rGO}$  nanocomposite.

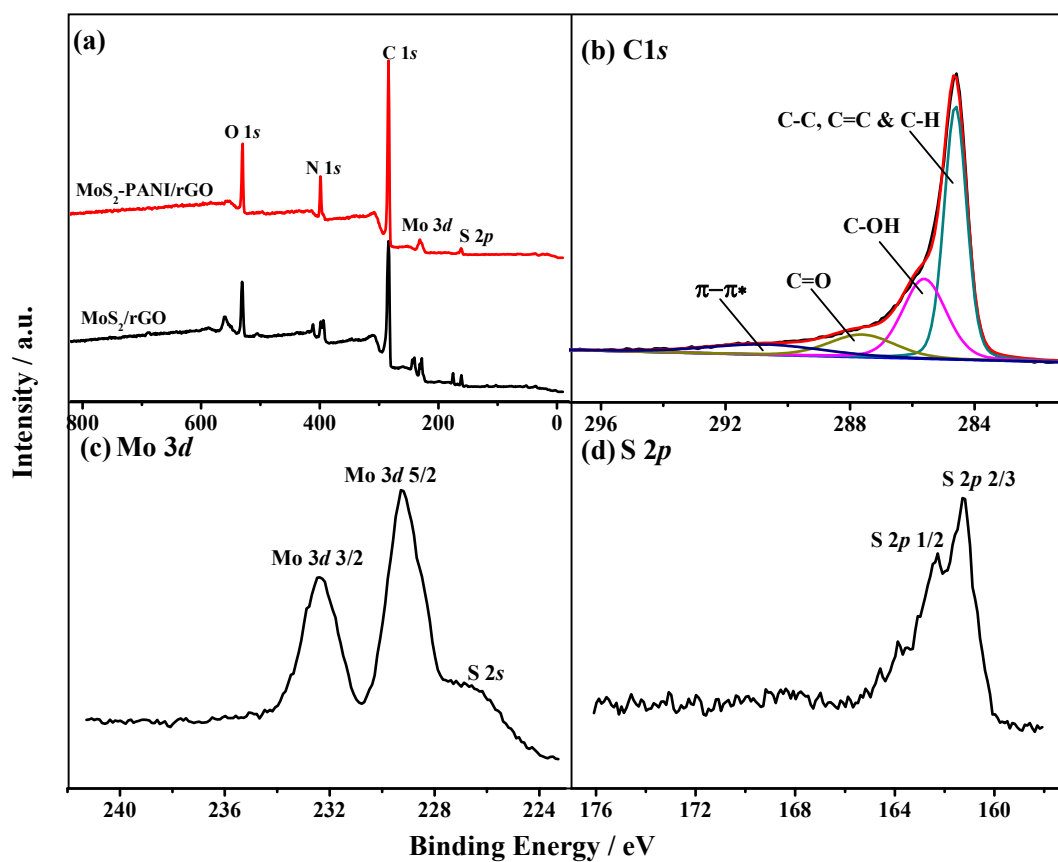

**Fig. S2** (a) XPS survey spectra of MoS<sub>2</sub>/rGO and MoS<sub>2</sub>-PANI/rGO; high-resolution XPS spectra of (b) C 1s, (c) Mo 3d, and (d) S 2p of MoS<sub>2</sub>/rGO.

**Table S1** The atomic% of C 1s, N 1s, O 1s, Mo 3d, and S 2p of MoS<sub>2</sub>/rGO and MoS<sub>2</sub>/rGO/PANI.

| Samples                    | Atomic % |      |      |       |     |
|----------------------------|----------|------|------|-------|-----|
|                            | C 1s     | N 1s | O 1s | Mo 3d | S2p |
| MoS <sub>2</sub> /rGO      | 82.9     | -    | 14.7 | 0.77  | 1.7 |
| MoS <sub>2</sub> -PANI/rGO | 74.5     | 11.8 | 10.8 | 0.88  | 2.0 |

### S3. SEM and TEM images of the samples

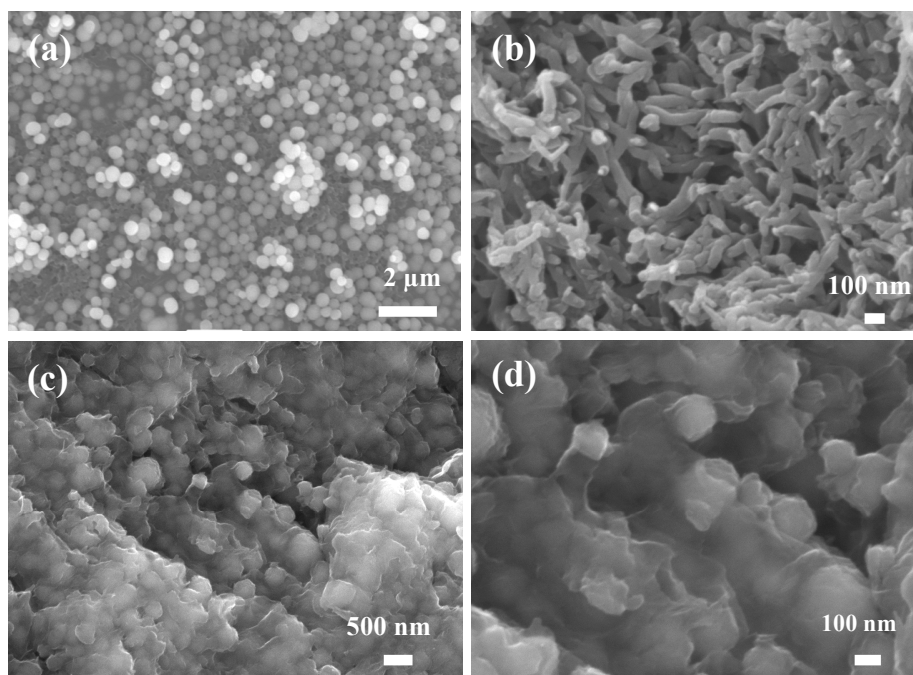

**Fig. S3** FE-SEM images of (a) MoS<sub>2</sub> nanospheres, (b) PANI, and (c-d) MoS<sub>2</sub>/rGO nanocomposite.

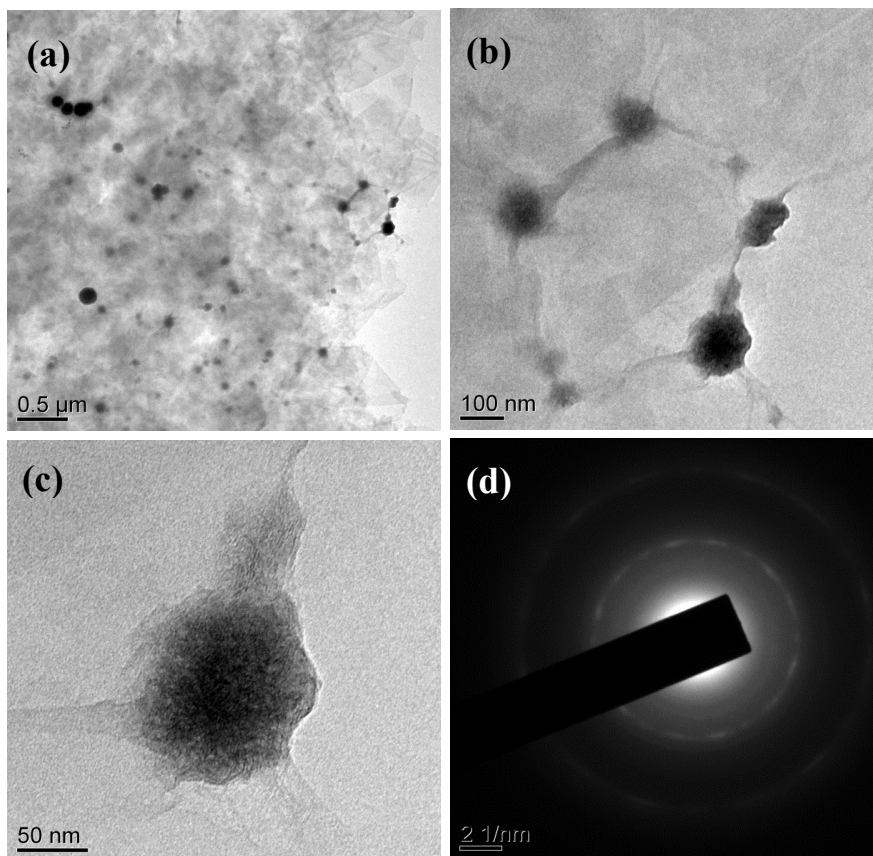

**Fig. S4** (a-b) TEM and (c) HR-TEM images of the MoS<sub>2</sub>/rGO, and (d) the corresponding SAED pattern.

#### S4. Electrochemical active surface area of the as-synthesized nanomaterials

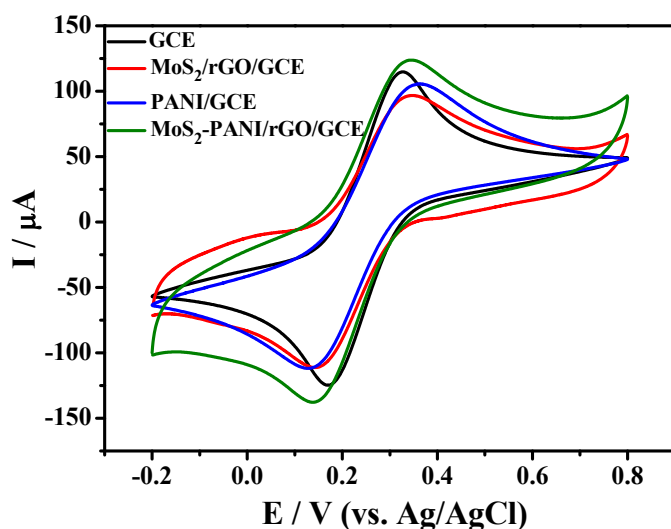

**Fig. S5** CV curves of the bare GCE, MoS<sub>2</sub>/rGO/GCE, PANI/GCE, and MoS<sub>2</sub>-PANI/rGO/GCE at scan rate of 100 mV·s<sup>-1</sup> in 0.1 M PBS (pH 7.0) containing 5 mM [Fe(CN)<sub>6</sub>]<sup>3-/4-</sup> and 0.1 M KCl.

CV measurements were used to evaluate the electrochemical performance of different materials modified electrodes. **Fig. S5** showed the CV curves of bare GCE and MoS<sub>2</sub>/rGO, PANI, MoS<sub>2</sub>-PANI/rGO-modified GCEs recorded in 0.1 M PBS (pH 7.0) containing 5 mM [Fe(CN)<sub>6</sub>]<sup>3-/4-</sup> and 0.1 M KCl at a scan rate of 100 mV·s<sup>-1</sup>. Compared with the bare GCE, the MoS<sub>2</sub>/rGO, PANI-modified electrode showed weak redox peaks, suggesting the film acted as a barrier for the electron transfer. For the MoS<sub>2</sub>-PANI/rGO-modified GCE, the peaks became more significant, indicating that the MoS<sub>2</sub>-PANI/rGO can enhance the electron transfer at the electrolyte/electrode interface. The electrochemical active surface area (*A*) of different electrodes was estimated according to the Randles–Sevcik equation <sup>6</sup> as follows:



$$I_p = 2.69 \times 10^5 (n^{3/2}) A D^{1/2} \nu^{1/2} C$$

wherein for  $\text{Fe}(\text{CN})_6^{3-}$ ,  $n=1$ ,  $D = 6.7 \times 10^{-6} \text{ cm}^2 \cdot \text{s}^{-1}$ ,  $C$  is the concentration of the probe molecule in the solution ( $\text{mol} \cdot \text{cm}^{-3}$ ),  $I_p$  equals  $I_{pc}$ , and  $\nu$  represents the scan rate of CV test. The calculated  $A$  values for the bare GCE and  $\text{MoS}_2/\text{rGO}$ , PANI,  $\text{MoS}_2\text{-PANI/rGO}$ -modified GCEs were 0.113, 0.101, 0.102, and 0.125  $\text{cm}^2$ , respectively. Therefore, the  $\text{MoS}_2\text{-PANI/rGO/GCE}$  showed the largest electroactive surface area in the different electrodes.

## S5. Reproducibility of the developed biosensor

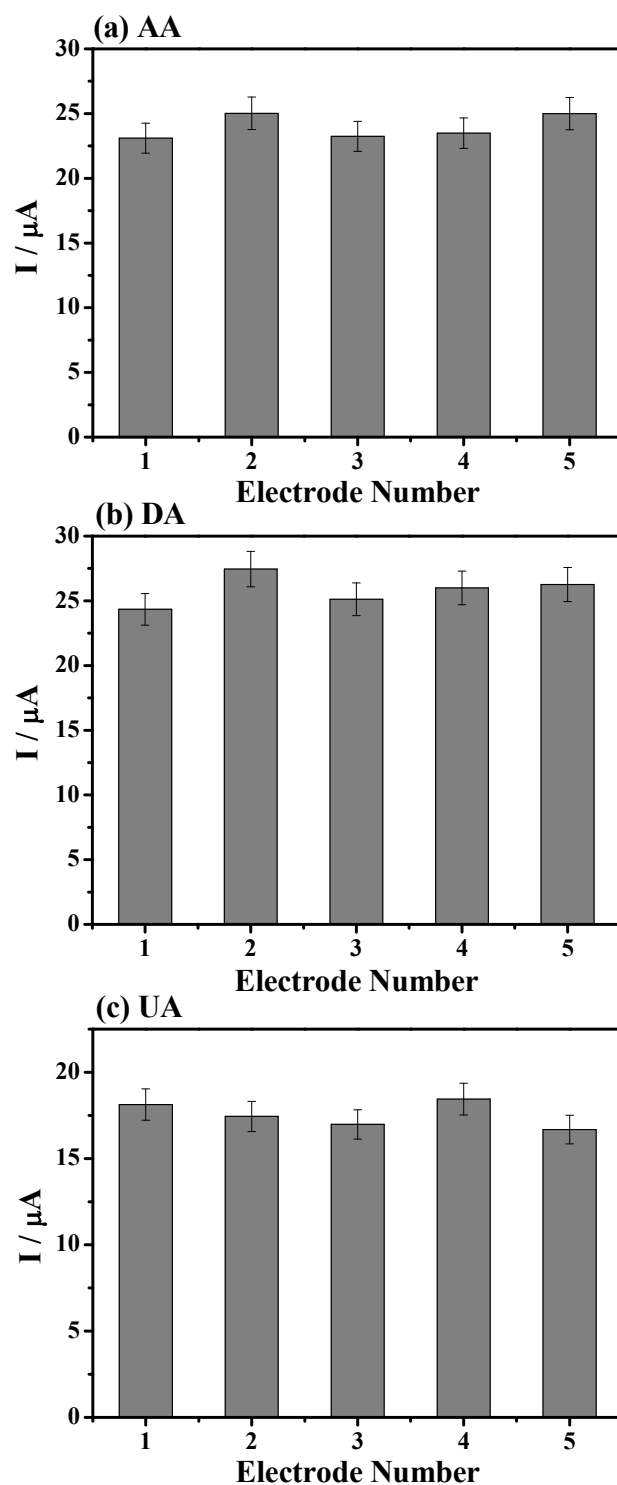

**Fig. S6** Peak currents of five MoS<sub>2</sub>/rGO modified Au electrodes in 0.1 M PBS (pH 7.0, 0.1 M KCl) containing 1.0 mM, 75  $\mu\text{M}$  DA, and 75  $\mu\text{M}$  UA for detection of (a) AA, (b) DA, and (c) UA.

## S6. Real sample analysis

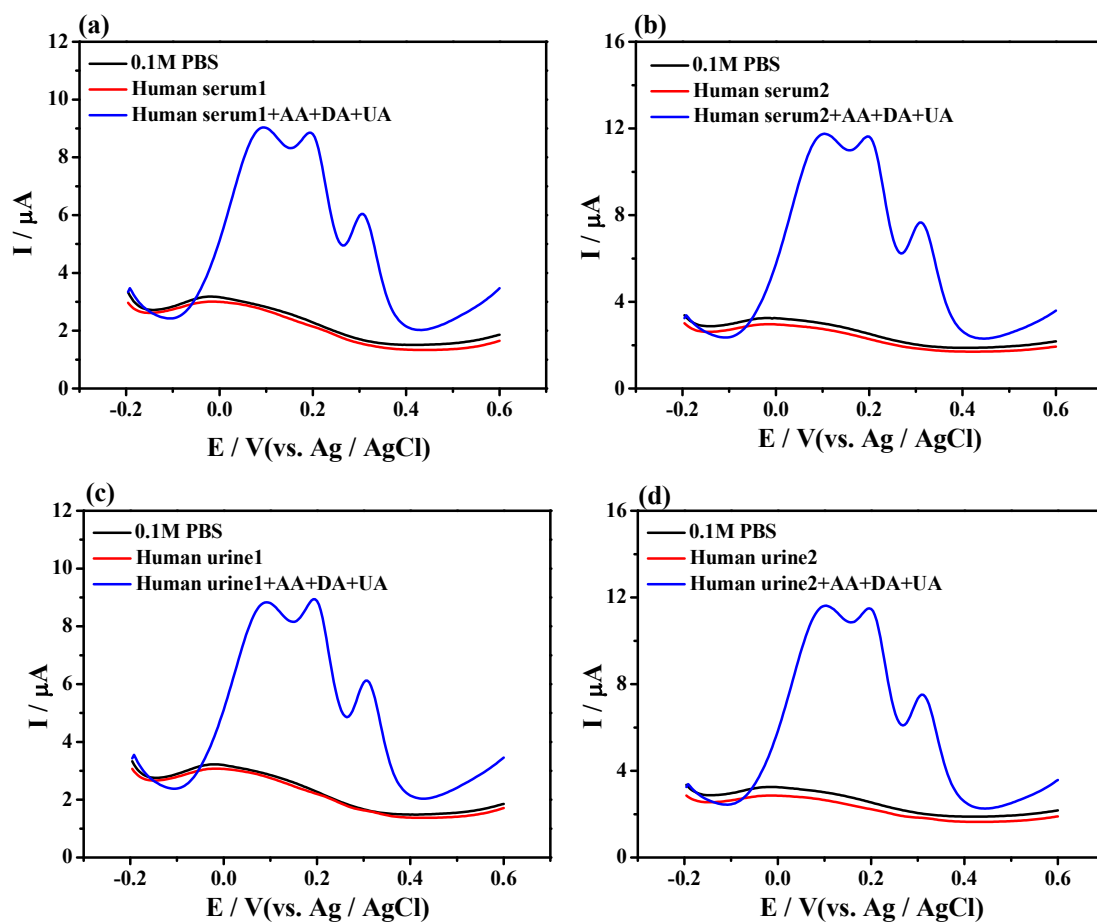

**Fig. S7** DPV curves of MoS<sub>2</sub>-PANI/rGO/GCE in real samples before and after spiking with AA, DA, and UA: (a) human serum<sup>1</sup>, (b) human serum<sup>2</sup>, (c) human urine<sup>1</sup>, and (d) human urine<sup>2</sup>.

## References

1. W. S. Hummers Jr and R. E. Offeman, *J. Am. Chem. Soc.*, 1958, **80**, 1339-1339.
2. Z. Zhang, F. Duan, L. He, D. Peng, F. Yan, M. Wang, W. Zong and C. Jia, *Microchim. Acta*, 2016, **183**, 1089-1097.
3. Y. Ren, J. Zhang, Y. Liu, H. Li, H. Wei, B. Li and X. Wang, *ACS Appl. Mater. Inter.*, 2012, **4**, 4776-4780.
4. Y. Zhu, E. Liu, Z. Luo, T. Hu, T. Liu, Z. Li and Q. Zhao, *Electrochim. Acta*, 2014, **118**, 106-111.
5. A. Garai and A. K. Nandi, *Synthetic Met.*, 2009, **159**, 1710-1716.
6. J. Lu, I. Do, L. T. Drzal, R. M. Worden and I. Lee, *ACS Nano*, 2008, **2**, 1825-1832.
